# Supplementary material for: Fish passage guidelines for the Auckland Region
Source: Springer Nature journal article supplement (doi:10.1038/s41596-021-00672-5), 2000-01-01
Supplement: MOESM1 [file 41596_2021_672_MOESM1_ESM22.pdf]

---

**Supplementary information**

---

**Preparation and use of wireless  
reprogrammable multilateral optogenetic  
devices for behavioral neuroscience**

---

In the format provided by the  
authors and unedited

## Supplementary Figure 1 – Tools for virus transduction and device implantation

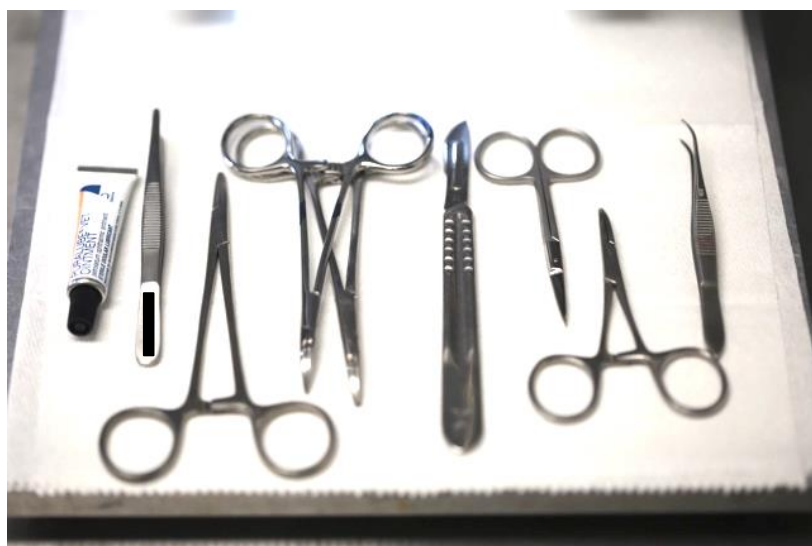

Supplementary Figure 1: Tools for virus transduction and device implantation.
